# Supplementary material for: Rapid regional assessment of rock glacier activity based on DInSAR wrapped phase signal
Source: Copernicus journal article supplement (doi:10.5194/egusphere-2024-1589), 2024-07-02
Supplement: Supplementary file 1 [file egusphere-2024-1589-supplement.pdf]

# **Rapid regional assessment of rock glacier activity based on DInSAR wrapped phase signal**

Federico Agliardi, Chiara Crippa, Daniele Codara, Federico Franzosi

**SUPPLEMENTARY MATERIALS**

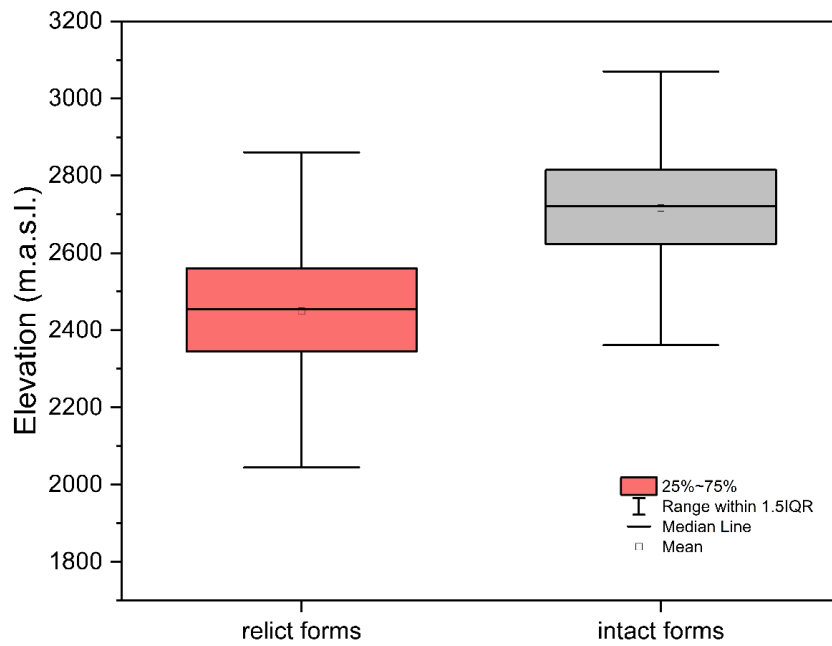

**Figure S1.** Altitude value distributions in the periglacial features mapped in the study area (geomorphological classification according to Scotti et al., 2013).

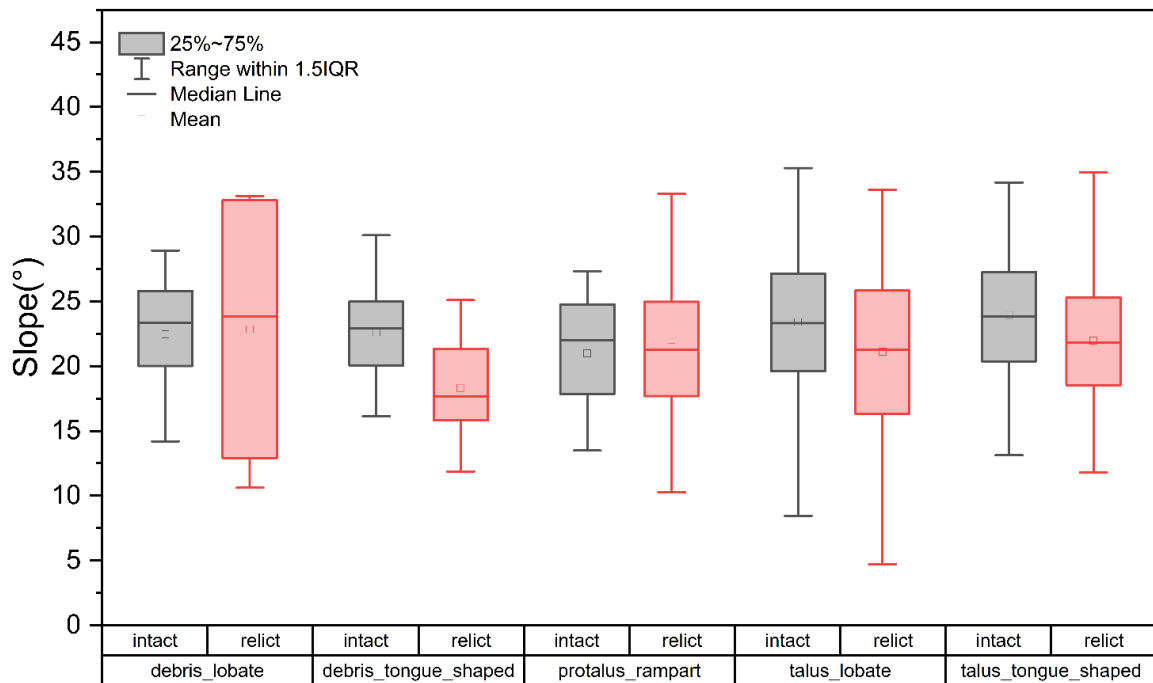

**Figure S2.** Topographic slope distributions in the periglacial features mapped in the study area (geomorphological classification according to Scotti et al., 2013).

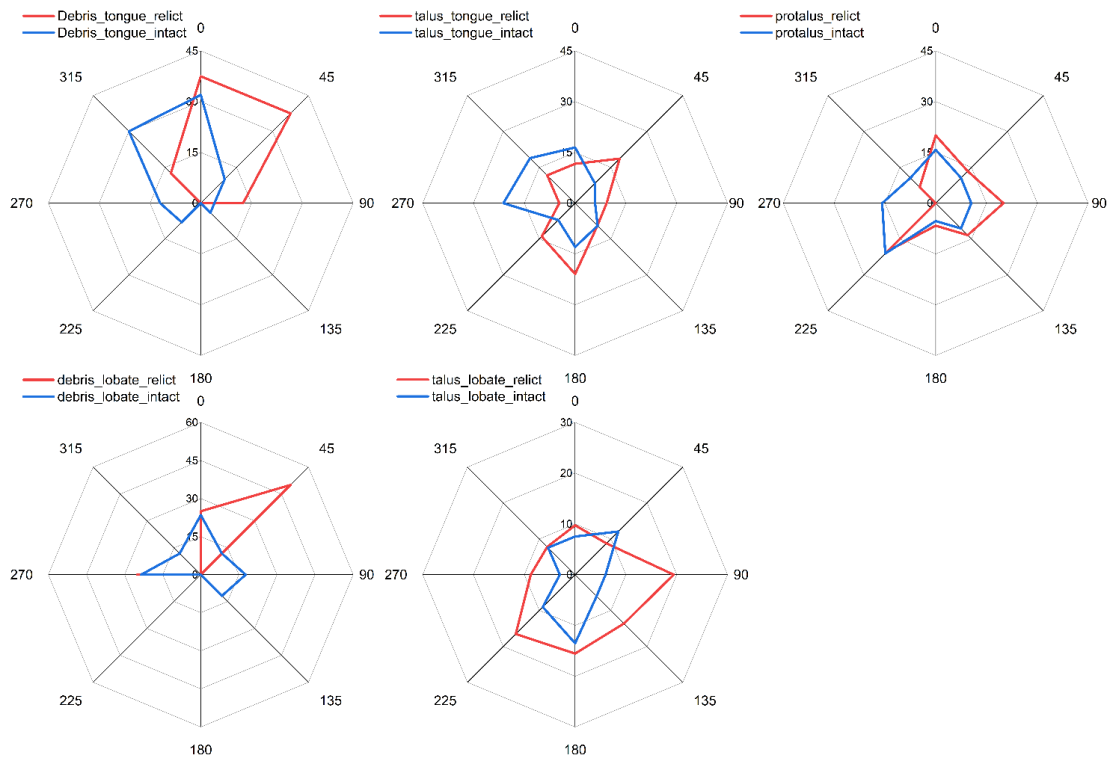

**Figure S3.** Topographic aspect distributions in the periglacial features mapped in the study area (geomorphological classification according to Scotti et al., 2013).

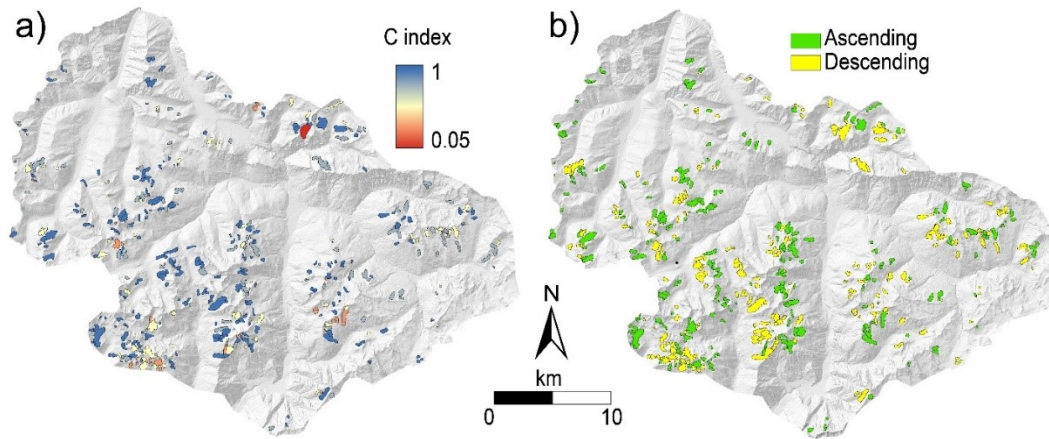

**Figure S4.** Maps portraying: a) the visibility of each periglacial landform to SAR sensors. Favourably oriented slopes have higher C index; b) most suitable satellite geometry for each mapped periglacial landform.

**Table S1.** SAR satellite datasets used in the analyses.

| Satellite  | Orbit type | incidence angle $\Theta$ | Orbital Azimuth $\delta$ | Orbit | # images | Period    |
|------------|------------|--------------------------|--------------------------|-------|----------|-----------|
| Sentinel-1 | Ascending  | $\sim 42^\circ$          | 10.23                    | 15    | 100      | 2017-2020 |
| Sentinel-1 | Descending | $\sim 41.8^\circ$        | 8.89                     | 168   | 94       | 2017-2020 |

**Table S2.** SAR images (Sentinel-1 A/B, SLC, IW) used for dual-pass interferogram generation.

| Descending |     |       | Ascending  |     |       |
|------------|-----|-------|------------|-----|-------|
| Date       | Sat | Track | Date       | Sat | Track |
| 03/06/2017 | SNT | 168   | 04/06/2017 | SNT | 15    |
| 09/06/2017 | SNT | 168   | 10/06/2017 | SNT | 15    |
| 15/06/2017 | SNT | 168   | 16/06/2017 | SNT | 15    |
| 21/06/2017 | SNT | 168   | 22/06/2017 | SNT | 15    |
| 27/06/2017 | SNT | 168   | 28/06/2017 | SNT | 15    |
| 03/07/2017 | SNT | 168   | 04/07/2017 | SNT | 15    |
| 09/07/2017 | SNT | 168   | 10/07/2017 | SNT | 15    |
| 15/07/2017 | SNT | 168   | 16/07/2017 | SNT | 15    |
| 21/07/2017 | SNT | 168   | 22/07/2017 | SNT | 15    |
| 27/07/2017 | SNT | 168   | 28/07/2017 | SNT | 15    |
| 02/08/2017 | SNT | 168   | 03/08/2017 | SNT | 15    |
| 08/08/2017 | SNT | 168   | 09/08/2017 | SNT | 15    |
| 14/08/2017 | SNT | 168   | 15/08/2017 | SNT | 15    |
| 20/08/2017 | SNT | 168   | 21/08/2017 | SNT | 15    |
| 26/08/2017 | SNT | 168   | 27/08/2017 | SNT | 15    |
| 01/09/2017 | SNT | 168   | 02/09/2017 | SNT | 15    |
| 07/09/2017 | SNT | 168   | 08/09/2017 | SNT | 15    |
| 13/09/2017 | SNT | 168   | 14/09/2017 | SNT | 15    |
| 19/09/2017 | SNT | 168   | 20/09/2017 | SNT | 15    |
| 25/09/2017 | SNT | 168   | 26/09/2017 | SNT | 15    |
| 01/10/2017 | SNT | 168   | 02/10/2017 | SNT | 15    |
| 07/10/2017 | SNT | 168   | 08/10/2017 | SNT | 15    |
| 13/10/2017 | SNT | 168   | 14/10/2017 | SNT | 15    |
| 25/10/2017 | SNT | 168   | 20/10/2017 | SNT | 15    |
| 31/10/2017 | SNT | 168   | 26/10/2017 | SNT | 15    |
| 04/06/2018 | SNT | 168   | 05/06/2018 | SNT | 15    |

|            |     |     |
|------------|-----|-----|
| 10/06/2018 | SNT | 168 |
| 16/06/2018 | SNT | 168 |
| 22/06/2018 | SNT | 168 |
| 28/06/2018 | SNT | 168 |
| 04/07/2018 | SNT | 168 |
| 10/07/2018 | SNT | 168 |
| 16/07/2018 | SNT | 168 |
| 22/07/2018 | SNT | 168 |
| 28/07/2018 | SNT | 168 |
| 03/08/2018 | SNT | 168 |
| 09/08/2018 | SNT | 168 |
| 15/08/2018 | SNT | 168 |
| 21/08/2018 | SNT | 168 |
| 27/08/2018 | SNT | 168 |
| 02/09/2018 | SNT | 168 |
| 08/09/2018 | SNT | 168 |
| 14/09/2018 | SNT | 168 |
| 20/09/2018 | SNT | 168 |
| 26/09/2018 | SNT | 168 |
| 02/10/2018 | SNT | 168 |
| 08/10/2018 | SNT | 168 |
| 14/10/2018 | SNT | 168 |
| 20/10/2018 | SNT | 168 |
| 26/10/2018 | SNT | 168 |
| 05/06/2019 | SNT | 168 |
| 11/06/2019 | SNT | 168 |
| 17/06/2019 | SNT | 168 |
| 23/06/2019 | SNT | 168 |
| 29/06/2019 | SNT | 168 |
| 05/07/2019 | SNT | 168 |
| 11/07/2019 | SNT | 168 |
| 17/07/2019 | SNT | 168 |
| 23/07/2019 | SNT | 168 |
| 29/07/2019 | SNT | 168 |
| 04/08/2019 | SNT | 168 |
| 10/08/2019 | SNT | 168 |
| 16/08/2019 | SNT | 168 |
| 22/08/2019 | SNT | 168 |
| 28/08/2019 | SNT | 168 |
| 03/09/2019 | SNT | 168 |
| 09/09/2019 | SNT | 168 |

|            |     |    |
|------------|-----|----|
| 11/06/2018 | SNT | 15 |
| 17/06/2018 | SNT | 15 |
| 23/06/2018 | SNT | 15 |
| 05/07/2018 | SNT | 15 |
| 11/07/2018 | SNT | 15 |
| 17/07/2018 | SNT | 15 |
| 23/07/2018 | SNT | 15 |
| 29/07/2018 | SNT | 15 |
| 04/08/2018 | SNT | 15 |
| 10/08/2018 | SNT | 15 |
| 16/08/2018 | SNT | 15 |
| 22/08/2018 | SNT | 15 |
| 28/08/2018 | SNT | 15 |
| 03/09/2018 | SNT | 15 |
| 09/09/2018 | SNT | 15 |
| 15/09/2018 | SNT | 15 |
| 21/09/2018 | SNT | 15 |
| 27/09/2018 | SNT | 15 |
| 03/10/2018 | SNT | 15 |
| 09/10/2018 | SNT | 15 |
| 15/10/2018 | SNT | 15 |
| 21/10/2018 | SNT | 15 |
| 27/10/2018 | SNT | 15 |
| 06/06/2019 | SNT | 15 |
| 12/06/2019 | SNT | 15 |
| 18/06/2019 | SNT | 15 |
| 30/06/2019 | SNT | 15 |
| 06/07/2019 | SNT | 15 |
| 12/07/2019 | SNT | 15 |
| 18/07/2019 | SNT | 15 |
| 24/07/2019 | SNT | 15 |
| 30/07/2019 | SNT | 15 |
| 05/08/2019 | SNT | 15 |
| 11/08/2019 | SNT | 15 |
| 17/08/2019 | SNT | 15 |
| 29/08/2019 | SNT | 15 |
| 04/09/2019 | SNT | 15 |
| 10/09/2019 | SNT | 15 |
| 16/09/2019 | SNT | 15 |
| 22/09/2019 | SNT | 15 |

|            |     |     |
|------------|-----|-----|
| 15/09/2019 | SNT | 168 |
| 21/09/2019 | SNT | 168 |
| 27/09/2019 | SNT | 168 |
| 03/10/2019 | SNT | 168 |
| 09/10/2019 | SNT | 168 |
| 15/10/2019 | SNT | 168 |
| 21/10/2019 | SNT | 168 |
| 27/10/2019 | SNT | 168 |
| 05/06/2020 | SNT | 168 |
| 11/06/2020 | SNT | 168 |
| 17/06/2020 | SNT | 168 |
| 23/06/2020 | SNT | 168 |
| 29/06/2020 | SNT | 168 |
| 05/07/2020 | SNT | 168 |
| 11/07/2020 | SNT | 168 |
| 17/07/2020 | SNT | 168 |
| 23/07/2020 | SNT | 168 |
| 29/07/2020 | SNT | 168 |
| 04/08/2020 | SNT | 168 |
| 10/08/2020 | SNT | 168 |
| 16/08/2020 | SNT | 168 |
| 22/08/2020 | SNT | 168 |
| 28/08/2020 | SNT | 168 |
| 03/09/2020 | SNT | 168 |
| 09/09/2020 | SNT | 168 |
| 15/09/2020 | SNT | 168 |
| 21/09/2020 | SNT | 168 |
| 27/09/2020 | SNT | 168 |
| 03/10/2020 | SNT | 168 |
| 09/10/2020 | SNT | 168 |
| 15/10/2020 | SNT | 168 |
| 21/10/2020 | SNT | 168 |
| 27/10/2020 | SNT | 168 |

|            |     |    |
|------------|-----|----|
| 28/09/2019 | SNT | 15 |
| 04/10/2019 | SNT | 15 |
| 10/10/2019 | SNT | 15 |
| 16/10/2019 | SNT | 15 |
| 28/10/2019 | SNT | 15 |

|            |     |    |
|------------|-----|----|
| 06/06/2020 | SNT | 15 |
| 12/06/2020 | SNT | 15 |
| 24/06/2020 | SNT | 15 |
| 30/06/2020 | SNT | 15 |
| 06/07/2020 | SNT | 15 |
| 12/07/2020 | SNT | 15 |
| 18/07/2020 | SNT | 15 |
| 24/07/2020 | SNT | 15 |
| 30/07/2020 | SNT | 15 |
| 05/08/2020 | SNT | 15 |
| 11/08/2020 | SNT | 15 |
| 17/08/2020 | SNT | 15 |
| 23/08/2020 | SNT | 15 |
| 29/08/2020 | SNT | 15 |
| 04/09/2020 | SNT | 15 |
| 10/09/2020 | SNT | 15 |
| 16/09/2020 | SNT | 15 |
| 22/09/2020 | SNT | 15 |
| 28/09/2020 | SNT | 15 |
| 04/10/2020 | SNT | 15 |
| 10/10/2020 | SNT | 15 |
| 22/10/2020 | SNT | 15 |
| 28/10/2020 | SNT | 15 |

**Table S3.** SAR interferograms generated in this study.

| <b>Geometry</b> | <b>Master</b> | <b>Slave</b> | <b><math>\Delta t</math> (dd)</b> | <b>Geometry</b> | <b>Master</b> | <b>Slave</b> | <b><math>\Delta t</math> (dd)</b> |
|-----------------|---------------|--------------|-----------------------------------|-----------------|---------------|--------------|-----------------------------------|
| Descending      | 21/06/2017    | 03/07/2017   | 12                                | Ascending       | 28/06/2017    | 10/07/2017   | 12                                |
| Descending      | 27/06/2017    | 09/07/2017   | 12                                | Ascending       | 16/07/2017    | 28/07/2017   | 12                                |
| Descending      | 03/07/2017    | 15/07/2017   | 12                                | Ascending       | 28/07/2017    | 09/08/2017   | 12                                |
| Descending      | 09/07/2017    | 21/07/2017   | 12                                | Ascending       | 15/08/2017    | 27/08/2017   | 12                                |
| Descending      | 15/07/2017    | 27/07/2017   | 12                                | Ascending       | 27/08/2017    | 08/09/2017   | 12                                |
| Descending      | 21/07/2017    | 02/08/2017   | 12                                | Ascending       | 14/10/2017    | 26/10/2017   | 12                                |
| Descending      | 02/08/2017    | 14/08/2017   | 12                                | Ascending       | 17/07/2018    | 29/07/2018   | 12                                |
| Descending      | 14/08/2017    | 26/08/2017   | 12                                | Ascending       | 29/07/2018    | 10/08/2018   | 12                                |
| Descending      | 20/08/2017    | 01/09/2017   | 12                                | Ascending       | 16/08/2018    | 28/08/2018   | 12                                |
| Descending      | 26/08/2017    | 07/09/2017   | 12                                | Ascending       | 28/08/2018    | 09/09/2018   | 12                                |
| Descending      | 22/06/2018    | 04/07/2018   | 12                                | Ascending       | 03/09/2018    | 15/09/2018   | 12                                |
| Descending      | 10/07/2018    | 22/07/2018   | 12                                | Ascending       | 09/09/2018    | 21/09/2018   | 12                                |
| Descending      | 22/07/2018    | 03/08/2018   | 12                                | Ascending       | 03/10/2018    | 15/10/2018   | 12                                |
| Descending      | 03/08/2018    | 15/08/2018   | 12                                | Ascending       | 24/07/2019    | 05/08/2019   | 12                                |
| Descending      | 08/09/2018    | 20/09/2018   | 12                                | Ascending       | 17/08/2019    | 29/08/2019   | 12                                |
| Descending      | 08/10/2018    | 20/10/2018   | 12                                | Ascending       | 16/09/2019    | 28/09/2019   | 12                                |
| Descending      | 14/10/2018    | 26/10/2018   | 12                                | Ascending       | 10/09/2020    | 22/09/2020   | 12                                |
| Descending      | 29/06/2019    | 11/07/2019   | 12                                | Ascending       | 04/06/2017    | 28/06/2017   | 24                                |
| Descending      | 05/07/2019    | 17/07/2019   | 12                                | Ascending       | 04/07/2017    | 28/07/2017   | 24                                |
| Descending      | 29/07/2019    | 10/08/2019   | 12                                | Ascending       | 10/07/2017    | 03/08/2017   | 24                                |
| Descending      | 04/08/2019    | 16/08/2019   | 12                                | Ascending       | 03/08/2017    | 27/08/2017   | 24                                |
| Descending      | 10/08/2019    | 22/08/2019   | 12                                | Ascending       | 15/08/2017    | 08/09/2017   | 24                                |
| Descending      | 16/08/2019    | 28/08/2019   | 12                                | Ascending       | 08/09/2017    | 02/10/2017   | 24                                |
| Descending      | 15/09/2019    | 27/09/2019   | 12                                | Ascending       | 17/06/2018    | 11/07/2018   | 24                                |
| Descending      | 21/09/2019    | 03/10/2019   | 12                                | Ascending       | 23/06/2018    | 17/07/2018   | 24                                |
| Descending      | 15/10/2019    | 27/10/2019   | 12                                | Ascending       | 23/07/2018    | 16/08/2018   | 24                                |
| Descending      | 17/06/2020    | 29/06/2020   | 12                                | Ascending       | 22/08/2018    | 15/09/2018   | 24                                |
| Descending      | 29/06/2020    | 11/07/2020   | 12                                | Ascending       | 28/08/2018    | 21/09/2018   | 24                                |
| Descending      | 05/07/2020    | 17/07/2020   | 12                                | Ascending       | 21/09/2018    | 15/10/2018   | 24                                |
| Descending      | 10/08/2020    | 22/08/2020   | 12                                | Ascending       | 05/08/2019    | 29/08/2019   | 24                                |
| Descending      | 16/08/2020    | 28/08/2020   | 12                                | Ascending       | 04/09/2019    | 28/09/2019   | 24                                |
| Descending      | 28/08/2020    | 09/09/2020   | 12                                | Ascending       | 24/07/2020    | 17/08/2020   | 24                                |
| Descending      | 03/09/2020    | 15/09/2020   | 12                                | Ascending       | 17/08/2020    | 10/09/2020   | 24                                |
| Descending      | 21/06/2017    | 15/07/2017   | 24                                | Ascending       | 29/08/2020    | 22/09/2020   | 24                                |
| Descending      | 27/06/2017    | 21/07/2017   | 24                                | Ascending       | 10/06/2017    | 08/09/2017   | 90                                |
| Descending      | 03/07/2017    | 27/07/2017   | 24                                | Ascending       | 16/07/2017    | 14/10/2017   | 90                                |
| Descending      | 09/07/2017    | 02/08/2017   | 24                                | Ascending       | 11/06/2018    | 09/09/2018   | 90                                |
| Descending      | 21/07/2017    | 14/08/2017   | 24                                | Ascending       | 11/07/2018    | 09/10/2018   | 90                                |
| Descending      | 07/10/2017    | 31/10/2017   | 24                                | Ascending       | 17/07/2018    | 15/10/2018   | 90                                |

|            |            |            |     |  |           |            |            |     |
|------------|------------|------------|-----|--|-----------|------------|------------|-----|
| Descending | 16/06/2018 | 10/07/2018 | 24  |  | Ascending | 18/06/2019 | 16/09/2019 | 90  |
| Descending | 22/06/2018 | 16/07/2018 | 24  |  | Ascending | 06/06/2020 | 04/09/2020 | 90  |
| Descending | 28/06/2018 | 22/07/2018 | 24  |  | Ascending | 10/06/2017 | 08/10/2017 | 120 |
| Descending | 04/07/2018 | 28/07/2018 | 24  |  | Ascending | 05/06/2018 | 09/10/2018 | 126 |
| Descending | 10/07/2018 | 03/08/2018 | 24  |  | Ascending | 23/06/2018 | 15/10/2018 | 114 |
| Descending | 16/07/2018 | 09/08/2018 | 24  |  | Ascending | 23/06/2018 | 21/10/2018 | 120 |
| Descending | 22/07/2018 | 15/08/2018 | 24  |  |           |            |            |     |
| Descending | 28/07/2018 | 21/08/2018 | 24  |  |           |            |            |     |
| Descending | 09/08/2018 | 02/09/2018 | 24  |  |           |            |            |     |
| Descending | 15/08/2018 | 08/09/2018 | 24  |  |           |            |            |     |
| Descending | 21/08/2018 | 14/09/2018 | 24  |  |           |            |            |     |
| Descending | 14/09/2018 | 08/10/2018 | 24  |  |           |            |            |     |
| Descending | 20/09/2018 | 14/10/2018 | 24  |  |           |            |            |     |
| Descending | 26/09/2018 | 20/10/2018 | 24  |  |           |            |            |     |
| Descending | 29/06/2019 | 23/07/2019 | 24  |  |           |            |            |     |
| Descending | 05/07/2019 | 29/07/2019 | 24  |  |           |            |            |     |
| Descending | 11/07/2019 | 04/08/2019 | 24  |  |           |            |            |     |
| Descending | 29/07/2019 | 22/08/2019 | 24  |  |           |            |            |     |
| Descending | 22/08/2019 | 15/09/2019 | 24  |  |           |            |            |     |
| Descending | 15/09/2019 | 09/10/2019 | 24  |  |           |            |            |     |
| Descending | 21/09/2019 | 15/10/2019 | 24  |  |           |            |            |     |
| Descending | 03/10/2019 | 27/10/2019 | 24  |  |           |            |            |     |
| Descending | 17/07/2020 | 10/08/2020 | 24  |  |           |            |            |     |
| Descending | 29/07/2020 | 22/08/2020 | 24  |  |           |            |            |     |
| Descending | 16/08/2020 | 09/09/2020 | 24  |  |           |            |            |     |
| Descending | 03/07/2017 | 01/10/2017 | 90  |  |           |            |            |     |
| Descending | 10/06/2018 | 08/09/2018 | 90  |  |           |            |            |     |
| Descending | 16/06/2018 | 14/09/2018 | 90  |  |           |            |            |     |
| Descending | 28/06/2018 | 26/09/2018 | 90  |  |           |            |            |     |
| Descending | 16/07/2018 | 14/10/2018 | 90  |  |           |            |            |     |
| Descending | 11/07/2019 | 09/10/2019 | 90  |  |           |            |            |     |
| Descending | 17/07/2019 | 15/10/2019 | 90  |  |           |            |            |     |
| Descending | 17/06/2020 | 15/09/2020 | 90  |  |           |            |            |     |
| Descending | 23/06/2020 | 21/09/2020 | 90  |  |           |            |            |     |
| Descending | 15/06/2017 | 31/10/2017 | 138 |  |           |            |            |     |
| Descending | 16/06/2018 | 14/10/2018 | 120 |  |           |            |            |     |
| Descending | 16/06/2018 | 20/10/2018 | 126 |  |           |            |            |     |
| Descending | 17/06/2019 | 27/10/2019 | 132 |  |           |            |            |     |
| Descending | 29/06/2019 | 27/10/2019 | 120 |  |           |            |            |     |
| Descending | 05/07/2019 | 27/10/2019 | 114 |  |           |            |            |     |
